# Supplementary material for: A Widespread Chromosomal Inversion Polymorphism Contributes to a Major Life-History Transition, Local Adaptation, and Reproductive Isolation
Source: PLoS Biol. 2010 Sep 28;8(9):e1000500. doi: 10.1371/journal.pbio.1000500 (PMC2946948; doi:10.1371/journal.pbio.1000500)
Supplement: Table S3 — Morphological trait variation in crosses between ecotypes measured in the greenhouse. (0.02 MB XLS) [file pbio.1000500.s008.xls]

## Sheet: Sheet1
Cross	Trait	Coastal Perenniala	F1 Hybridb	F2 hybridc	Inland Annuald
BCBxCAN	Flowering time (days)	37.67+/-0.61 (24)	29.60+/-0.54 (25)	34.34+/-0.45 (172)	27.50+/-0.68 (24)
	Stem thickness (mm)	6.79+/-0.13 (24)	4.74+/-0.25 (25)	3.11+/-0.22 (172)	1.28+/-0.11 (24)
	Internode length (mm)	31.97+/-2.24 (24)	113.71+/-4.89 (25)	52.72+/-2.24 (172)	55.47+/-6.96 (24)
	Corolla width (mm)	36.49+/-0.55 (24)	31.20+/-0.47 (25)	24.94+/-0.33 (172)	18.50+/-0.46 (23)
	Corolla tube length (mm)	26.54+/-0.29 (24)	22.19+/-0.26 (25)	19.86+/-0.16 (172)	15.87+/-0.28 (23)
	Aboveground rootse	2.06+/-0.33 (24)	0.04+/-0.04 (25)	0.32+/-0.07 (170)	0.00+/-0.00 (23)
SWBxLMC	Flowering time (days)	37.35+/-0.87 (20)	29.6+/-0.74 (20)	31.49+/-0.33 (157)	30.10+/-0.62 (20)
	Stem thickness (mm)	5.23+/-0.15 (20)	3.47+/-0.14 (20)	4.25+/-0.08 (158)	2.95+/-0.17 (20)
	Internode length (mm)	20.59+/-1.80 (20)	74.63+/-3.92 (20)	47.51+/-2.31 (158)	2.24+/-0.10 (20)
	Corolla width (mm)	33.26+/-0.74 (20)	29.16+/-0.88 (20)	28.72+/-0.24 (158)	22.90+/-0.59 (20)
	Corolla tube length (mm)	24.34+/-0.39 (20)	19.94+/-0.30 (20)	19.68+/-0.13 (158)	16.52+/-0.56 (20)
OPBxRGR	Flowering time (days)	33.16+/-0.44 (19)	27.22+/-0.43 (23)	30.17+/-0.15 (126)	23.47+/-0.43 (17)
	Stem thickness (mm)	4.98+/-0.12 (19)	3.27+/-0.10 (23)	2.83+/-0.07 (126)	2.59+/-0.13 (17)
	Internode length (mm)	26.19+/-2.23 (19)	65.14+/-2.19 (23)	42.7+/-1.77 (126)	53.68+/-1.71 (17)
	Corolla width (mm)	33.12+/-0.48 (19)	29.19+/-0.51 (23)	24.97+/-0.32 (126)	24.16+/-0.49 (17)
	Corolla tube length (mm)	24.85+/-1.17 (19)	18.75+/-0.24 (23)	18.49+/-0.19 (126)	16.07+/-0.26 (17)
	Aboveground rootse	5.37+/-0.35 (19)	0.65+/-0.24 (23)	0.72+/-0.13 (124)	0.00+/-0.00 (17)
OSWxSAM	Flowering time (days)	43.60+/-0.88 (20)	30.00+/-0.58 (18)	29.94+/-0.27 (157)	26.95+/-0.56 (20)
	Stem thickness (mm)	5.50+/-0.17 (20)	2.96+/-0.46 (18)	3.83+/-0.08 (157)	1.98+/-0.07 (20)
	Internode length (mm)	12.13+/-1.06 (20)	25.08+/-1.16 (18)	22.75+/-0.91 (157)	36.54+/-2.02 (20)
	Corolla width (mm)	31.17+/-0.97 (20)	31.88+/-0.45 (18)	30.64+/-0.30 (157)	26.46+/-0.90 (20)
	Corolla tube length (mm)	23.66+/-0.30 (20)	21.86+/-1.34 (18)	21.48+/-0.16 (157)	17.48+/-0.40 (20)
aTrait mean+/-SE and sample size in parentheses for coastal parentals (BCB, SWB, OPB, OSW)
bTrait mean+/-SE and sample size in parentheses for F1 hybrids
cTrait mean+/-SE and sample size in parentheses for F2 hybrids
dTrait mean+/-SE and sample size in parentheses for inland parentals (CAN, LMC, RGR, SAM)
eNumber of nodes producing aboveground roots was measured only in two of the four crosses
